# Supplementary material
Source: ML conference proceedings conference paper supplement (https://openreview.net/forum?id=Ia1nRDN00L)
Supplement: supplementary_material [file appendix.pdf › appendix.pdf]

## 696 A Conclusion

697 In this paper, we addressed the challenge of estimating treatment effects on rare, high-impact events  
 698 by uniting tools from causal inference and extreme value theory. We introduced a new estimand that  
 699 explicitly captures how an intervention shifts the tail average of the outcome distribution. Exploiting  
 700 the spectral–magnitude decomposition inherent in multivariate regular variation, we obtained a  
 701 simple, implementable identification formula (Proposition 3.3). Building on this, we constructed both  
 702 inverse-propensity-weighted (IPW) and doubly-robust (DR) estimators, and we further established  
 703 non-asymptotic error bounds under a Pareto-type tail assumption (Theorem 3.5, Corollary 3.6). In  
 704 simulations and real-data experiments, our methods consistently outperformed naive estimators when  
 705 targeting extreme outcomes, thereby validating our theoretical guarantees. We believe this work  
 706 opens the door to more refined causal analyses in applications—such as disaster risk reduction and  
 707 financial risk management—where understanding treatment effects in the tail is paramount. One  
 708 limitation of this work is that we mainly use heuristics to estimate the scaling exponential  $\alpha$ , which  
 709 lacks a theoretical guarantee. For future direction, we would like to explore how to estimate the  
 710 exponential  $\alpha$  and develop a more adaptive method for choosing thresholds for our estimators.

## 711 B Proofs

### 712 B.1 Identification Formula

713 In this subsection, we derive the identification formula in Proposition 3.3.

714 *Proof.* We first prove (3.4). By Assumption 3.2,

$$\begin{aligned} \lim_{t \rightarrow \infty} \mathbb{E} \left[ \frac{Y(1) - Y(0)}{t^\alpha} \mid \|U\| > t \right] &= \lim_{t \rightarrow \infty} \mathbb{E} \left[ \frac{f(X, 1, U) - f(X, 0, U)}{t^\alpha} \mid \|U\| > t \right] \\ &= \lim_{t \rightarrow \infty} \mathbb{E} \left[ \frac{f(X, 1, U) - f(X, 0, U)}{\|U\|^\alpha} \cdot \left( \frac{\|U\|}{t} \right)^\alpha \mid \|U\| > t \right] \\ &= \lim_{t \rightarrow \infty} \mathbb{E} \left[ (g(X, 1, U/\|U\|) - g(X, 0, U/\|U\|) + 2e(t)) \cdot \left( \frac{\|U\|}{t} \right)^\alpha \mid \|U\| > t \right] \end{aligned}$$

715 We next argue that  $\lim_{t \rightarrow \infty} \mathbb{E}[(\|U\|/t)^\alpha \mid \|U\| > t] = \alpha/(\beta - \alpha)$ . We have

$$\begin{aligned} \mathbb{E}[(\|U\|/t)^\alpha \mid \|U\| > t] &= 1 + \int_1^\infty P((\|U\|/t)^\alpha \geq r \mid \|U\| > t) \, dr \\ &= 1 + \frac{\int_1^\infty P(\|U\|/t > r^{1/\alpha}) \, dr}{P(\|U\| > t)} \\ &= 1 + \frac{\int_1^\infty \alpha P(\|U\| > rt) r^{\alpha-1} \, dr}{P(\|U\| > t)} \end{aligned}$$

716 Note that  $\|U\|$  is also regularly varying. By Potter’s theorem [Bingham et al., 1989, Theorem 1.56],  
 717 for any  $\epsilon > 0$  and sufficiently large  $t$ , we have

$$\frac{P(\|U\| > rt)}{P(\|U\| > t)} \leq 2r^{-\beta+\epsilon}.$$

718 Take  $\epsilon > 0$  such that  $\alpha - \beta + \epsilon - 1 < -1$ , we have for sufficiently large  $t$ ,

$$\frac{\int_1^\infty \alpha P(\|U\| > rt) r^{\alpha-1} \, dr}{P(\|U\| > t)} \leq 2 \int_1^\infty \alpha r^{\alpha-\beta+\epsilon-1} \, dr < \infty.$$

719 Therefore, by the dominance convergence theorem,

$$\mathbb{E}[(\|U\|/t)^\alpha \mid \|U\| > t] \rightarrow 1 + \int_1^\infty \alpha r^{-\beta} \cdot r^{\alpha-1} \, dr = \beta/(\beta - \alpha),$$

720 which implies

$$\lim_{t \rightarrow \infty} e(t) \mathbb{E}[(\|U\|/t)^\alpha \mid \|U\| > t] = 0$$

721 and (3.4) holds. We then verify the uniform integrability of function

$$h(U) = \mathbb{E}_X[(g(X, 1, U/\|U\|) - g(X, 0, U/\|U\|))(\|U\|/t)^\alpha].$$

722 Note that by Assumption 3.2,  $g$  is a continuous function on a compact set and thus is bounded by  
723 some constant  $C > 0$ . We have

$$\mathbb{E}[|h(U)| \mid \|U\| > t] \leq 2C \mathbb{E}[(\|U\|/t)^\alpha \mid \|U\| > t].$$

724 We have proven that the Right Hand Side (RHS) converges to a constant as  $t \rightarrow \infty$ , which implies  
725 that  $\mathbb{E}[|h(U)| \mid \|U\| > t]$  is uniformly bounded. We conclude that  $h(U)$  is uniformly integrable. By  
726 the uniform-integrability convergence theorem,

$$\begin{aligned} \lim_{t \rightarrow \infty} \mathbb{E} \left[ (g(X, 1, U/\|U\|) - g(X, 0, U/\|U\|)) \cdot \left( \frac{\|U\|}{t} \right)^\alpha \mid \|U\| > t \right] &= \mathbb{E}_{(r, \theta) \sim \mathcal{L}}[(g(X, 1, \theta) - g(X, 0, \theta))r^\alpha] \\ &= \mathbb{E}_{\theta \sim \mathcal{L}}[(g(X, 1, \theta) - g(X, 0, \theta))] \mathbb{E}_{r \sim \mathcal{L}}[r^\alpha]. \end{aligned}$$

727 where  $\mathcal{L}$  is the limiting distribution of  $(\|U\|/t, U/\|U\|) \mid \|U\| > t$  and we use the asymptotic  
728 independent property of regularly varying distributions (Definition 2.3).  $\square$

## 729 B.2 Non-asymptotic Analysis

730 To obtain a convergence rate for the estimator  $\hat{\theta}_n^t$ , we first analyze the rate of the two factors  $\hat{\gamma}_n$  and  
731  $\hat{\eta}_{n,t}^{\text{DR}}$ .

732 **Lemma B.1.** Under Assumption 3.1, 3.4 with probability at least  $1 - \delta$ , for sufficiently large  $n$ , we  
733 have

$$|\gamma - \hat{\gamma}_n| \leq O \left( \left( \frac{\log(2/\delta)}{n} \right)^{1/(2+\beta)} \right),$$

734 where  $\gamma = 1/\beta$  is the EVI of  $U$ .

735 *Proof.* We adopt the non-asymptotic analysis of the adaptive Hill estimator for EVI in [Boucheron  
736 and Thomas, 2015]. In the paper, the author adopts an adaptive estimator, choosing  $k$  to be

$$k = \max \left\{ k \in \{l_n, \dots, n\} \text{ and } \forall i \in \{l_n, \dots, n\}, |\hat{\gamma}(i) - \hat{\gamma}(k)| \leq \frac{\hat{\gamma}(i)r_n(\delta)}{\sqrt{i}} \right\}$$

737 where  $\hat{\gamma}(i) = \frac{1}{i} \sum_{j=1}^i \log \frac{\|U_{(j)}\|}{\|U_{(i+1)}\|}$  and  $r_n(\delta)$  scales like  $\sqrt{\log((2/\delta) \log(n))}$ . First, we verify the  
738 von Mises conditions in Boucheron and Thomas [2015] under Assumption 3.4. Let  $F$  be the CDF of  
739  $\|U\|$ . By Assumption 3.4, we know that

$$g(z) = c\alpha^m \prod_{i=1}^m (1 + z_i)^{-\alpha-1}, \|z\|_1 > \zeta k^{(1-2s)/\alpha}.$$

740 Note that

$$|c - 1| = \left| \frac{g(z) - \alpha^m \prod_{i=1}^m (1 + z_i)^{-\alpha-1}}{\alpha^m \prod_{i=1}^m (1 + z_i)^{-\alpha-1}} \right| \leq \xi k^{-s} \leq \xi.$$

741 Let  $\tilde{Z}_1, \dots, \tilde{Z}_m \sim \alpha c^{1/m} (1 + z)^{-\alpha-1}, z \geq c^{1/(m\alpha)} - 1$ . Then, we verify the upper bound for the  
742 von Mises function, i.e.,  $\sup_{s \geq t} |\eta(s)| \leq O(t^\rho)$  for some  $\rho < 0$ , where  $\eta$  is the von Mises function.

$$\eta(t) = \frac{tU'(t)}{U(t)} - \frac{1}{\beta} \tag{B.1}$$

$$= \frac{1}{tU(t)f(U(t))} - \frac{1}{\beta}, \tag{B.2}$$

743 where  $f(t)$  is the density function of  $\sum_{i=1}^m a_i \tilde{z}_i$ . By [Nguyen, 2014, Theorem 2.1], we have that  
 744 when  $\|U\|_1 > \max_i \{a_i\} \zeta k^{(1-2s)/\alpha}$ ,

$$f(t) = C\beta t^{-\beta-1}(1 + D(1 - 1/\beta)t^{-1} + o(t^{-1})). \quad (\text{B.3})$$

745 Then,

$$\bar{F}(t) = 1 - F(t) = Ct^{-\beta}(1 + Dt^{-1} + o(t^{-1}))$$

746 and

$$U(t) = C^{1/\beta} t^{1/\beta} (1 + DC^{-1/\beta} t^{-1/\beta} / \beta + o(t^{-1/\beta})). \quad (\text{B.4})$$

747 Plug in (B.3) and (B.4) into (B.2), we get

$$\eta(t) = \frac{1}{\beta(1 - DC^{-1/\beta} t^{-1/\beta} + o(t^{-1/\beta}))} - \frac{1}{\beta} = O(t^{-1/\beta}).$$

748 Therefore, the growth rate of the von Mises function is bounded. By [Boucheron and Thomas, 2015],  
 749 with probability at least  $1 - \delta$ , we have

$$|\gamma - \hat{\gamma}_n| \leq O\left(\left(\frac{\log(2/\delta)}{n}\right)^{1/(2+\beta)}\right),$$

750

□

751 **Lemma B.2.** Under the assumption of Theorem 3.5, with probability at least  $1 - \delta$ , we have

$$|\hat{\eta}_{n,t}^{\text{DR}} - \eta| \leq O(\sqrt{R_p(n/2, \delta) R_g(t^{-\beta} n, \delta)} + t^{\beta/2} n^{-1/2} + t^{-\min\{1, \beta\}} + t^{-\beta s/(1-2s)} + e(t) + \log(t) R_\alpha(n, \delta)).$$

752 *Proof.* Let

$$\eta^t = \mathbb{E} \left[ \frac{f(X, 1, U) - f(X, 0, U)}{\|U\|^{\hat{\alpha}_n}} \mid \|U\| > t \right],$$

753 We have the following decomposition

$$|\hat{\eta}_{n,t}^{\text{DR}} - \eta| \leq |\hat{\eta}_{n,t}^{\text{DR}} - \eta^t| + |\eta^t - \eta|.$$

754 The first term comes from the standard statistical error of DR estimator, while the second term is  
 755 the bias term caused by the finite threshold. For the first term, by standard DML theory [Foster and  
 756 Syrgkanis, 2023], we have

$$|\hat{\eta}_{n,t}^{\text{DR}} - \eta^t| \leq O\left(\sqrt{R_p(n/2, \delta) R_g(n_t, \delta)} + n_t^{-1/2}\right),$$

757 where  $n_t = \sum_{i=1}^{n/2} I(\|U_i\| > t)$  is a random variable. By Bernstein's inequality, with probability at  
 758 least  $1 - \delta$ ,

$$n_t - n\mathbb{P}(\|U\| > t)/2 \geq O\left(\log(1/\delta) + \sqrt{n\mathbb{P}(\|U\| > t) \log(1/\delta)}\right)$$

759 Therefore, with the same probability, when  $n \geq \Theta(\log(1/\delta)t^\beta)$ .

$$n_t \geq \frac{1}{4} n\mathbb{P}(\|U\| > t) = \Theta(nt^{-\beta})$$

760 and we have

$$|\hat{\eta}_{n,t}^{\text{DR}} - \eta^t| \leq O\left(\sqrt{R_p(n/2, \delta) R_g(nt^{-\beta}, \delta)} + t^{\beta/2} n^{-1/2}\right), \quad (\text{B.5})$$

761 where we use the monotonicity of  $R_p, R_g$ .

762 For the second term (the bias term),

$$\begin{aligned}
|\eta^t - \eta| &= \left| \mathbb{E} \left[ \frac{f(X, 1, U) - f(X, 0, U)}{\|U\|^{\hat{\alpha}_n}} \mid \|U\| > t \right] - \mathbb{E}[g(X, 1, U/\|U\|) - g(X, 0, U/\|U\|)] \right| \\
&\leq \left| \mathbb{E} \left[ \frac{f(X, 1, U) - f(X, 0, U)}{\|U\|^\alpha} - g(X, 1, U/\|U\|) - g(X, 0, U/\|U\|) \mid \|U\| > t \right] \right| \\
&\quad + |\mathbb{E}[g(X, 1, U/\|U\|) - g(X, 0, U/\|U\|)] - \mathbb{E}[g(X, 1, U/\|U\|) - g(X, 0, U/\|U\|) \mid \|U\| > t]| \\
&\quad + \left| \mathbb{E} \left[ \frac{f(X, 1, U) - f(X, 0, U)}{\|U\|^\alpha} (1 - \|U\|^{\alpha - \hat{\alpha}_n}) \right] \right| \\
&\leq 2e(t) + |\mathbb{E}[g(X, 1, U/\|U\|) - g(X, 0, U/\|U\|)] - \mathbb{E}[g(X, 1, U/\|U\|) - g(X, 0, U/\|U\|) \mid \|U\| > t]| \\
&\quad + \left| \mathbb{E} \left[ \frac{f(X, 1, U) - f(X, 0, U)}{\|U\|^\alpha} (1 - \|U\|^{\alpha - \hat{\alpha}_n}) \right] \mid \|U\| > t \right|
\end{aligned}$$

763 where we use Assumption 3.2 in the last equality. By the error rate assumption in Theorem 3.5,

$$\begin{aligned}
\left| \mathbb{E} \left[ \frac{f(X, 1, U) - f(X, 0, U)}{\|U\|^\alpha} (1 - \|U\|^{\alpha - \hat{\alpha}_n}) \right] \mid \|U\| > t \right| &\leq C \mathbb{E} \left[ |1 - \|U\|^{\alpha - \hat{\alpha}_n}| \mid \|U\| > t \right] \\
&= O(\log(t) R_\alpha(n, \delta)).
\end{aligned}$$

764 Since  $g$  is  $L$ -Lipschitz continuous, the second term is upper bounded by Wasserstein distance  
765  $LW_1(\mathcal{L}_{U/\|U\|}^t, \mathcal{L}_{U/\|U\|})$ , where  $\mathcal{L}_{U/\|U\|}^t$  is the distribution of  $U/\|U\|$  conditioning on  $\|U\| > t$  and  
766  $\mathcal{L}_{U/\|U\|}$  is its limiting distribution as  $t \rightarrow \infty$ . Therefore, we have

$$\begin{aligned}
|\eta^t - \eta| &\leq 2e(t) + LW_1(\mathcal{L}_{U/\|U\|}^t, \mathcal{L}_{U/\|U\|}) + O(\log(t) R_\alpha(n, \delta)) \\
&\leq 2e(t) + O(t^{-\min\{1, \beta\}} + t^{-\beta s/(1-2s)} + \log(t) R_\alpha(n, \delta)), \tag{B.6}
\end{aligned}$$

767 where we use [Zhang et al., 2023, Proposition 3.1] in the last inequality to upper bound the bias term  
768  $W_1(\mathcal{L}_{U/\|U\|}^t, \mathcal{L}_{U/\|U\|})$ . Combing (B.5) and (B.6), we get

$$|\hat{\eta}_n^t - \eta| \leq O(\sqrt{R_p(n/2, \delta) R_g(t^{-\beta} n, \delta)} + t^{\beta/2} n^{-1/2} + t^{-\min\{1, \beta\}} + t^{-\beta s/(1-2s)} + e(t) + \log(t) R_\alpha(n, \delta)).$$

769 □

770 **Lemma B.3.** Under the assumption of Theorem 3.5, with probability at least  $1 - \delta$ , we have

$$|\hat{\eta}_{n,t}^{\text{IPW}} - \eta| \leq O(R_p(n/2, \delta) + t^{\beta/2} n^{-1/2} + t^{-\min\{1, \beta\}} + t^{-\beta s/(1-2s)} + e(t)).$$

771 *Proof.* Similar to Lemma B.2, we have the following decomposition.

$$|\hat{\eta}_{n,t}^{\text{IPW}} - \eta| \leq |\hat{\eta}_{n,t}^{\text{IPW}} - \eta^t| + |\eta^t - \eta|.$$

772 Term  $|\eta^t - \eta|$  can be bounded in the same way as in the proof of Lemma B.2. By [Su et al., 2023,  
773 Theorem 1], we have

$$|\hat{\eta}_{n,t}^{\text{IPW}} - \eta^t| \leq O(R_p(n/2, \delta) + n_t^{-1/2}) = O(R_p(n/2, \delta) + t^{\beta/2} n^{-1/2} + \log(t) R_\alpha(n, \delta)).$$

774 The rest of the proof is similar. □

775 Now we are ready to prove Theorem 3.5.

776 *Proof of Theorem 3.5.* Note that by the asymptotic independence property of regularly varying  
777 distribution,

$$\begin{aligned}
|\hat{\theta}_{n,t}^{\text{DR}} - \theta^{\text{NETE}}| &= |\hat{\eta}_{n,t}^{\text{DR}} \cdot \hat{\mu}_n - \eta \cdot \mu| \\
&\leq |\mu| \cdot |\hat{\eta}_{n,t}^{\text{DR}} - \eta| + |\hat{\eta}_{n,t}^{\text{DR}}| \cdot |\hat{\mu}_n - \mu|. \tag{B.7}
\end{aligned}$$

By Lemma B.1 and B.2, with high probability,  $\hat{\gamma}_n$  and  $|\hat{\eta}_{n,t}^{\text{DR}}|$  is bounded. Note that by Lemma B.1,

$$|\hat{\mu}_n - \mu| = \left| \frac{1}{1 - \hat{\alpha}_n \hat{\gamma}_n} - \frac{1}{1 - \alpha \gamma} \right| = O(|\hat{\alpha}_n - \alpha| + |\hat{\gamma}_n - \gamma|) = O(\log(1/\delta) n^{-1/(2+\beta)} + R_\alpha(n, \delta))$$

Therefore, by Lemma B.2 and (B.7),

$$\begin{aligned} |\hat{\theta}_{n,t}^{\text{DR}} - \theta^{\text{NETE}}| &\leq O(\sqrt{R_p(n/2, \delta) R_g(nt^{-\beta}, \delta)} + t^{\beta/2} n^{-1/2} + \log(1/\delta) n^{-1/(2+\beta)} \\ &\quad + t^{-\min\{1, \beta\}} + t^{-\beta s/(1-2s)} + \log(t) R_\alpha(n, \delta) + e(t)). \end{aligned}$$

The bound for  $\hat{\theta}_{n,t}^{\text{IPW}}$  can be proven similarly.  $\square$

**Corollary B.4** (Convergence rate for IPW). Under the assumptions of Theorem 3.5, further suppose that

$$R_p(n, \delta) = \Theta(\log(1/\delta) n^{-1/2}), R_g(n, \delta) = \Theta(\log(1/\delta) n^{-1/2}), R_\alpha(n, \delta) = \Theta(\log(1/\delta) n^{-c_\alpha}),$$

for some  $c_\alpha > 0$ , the following conclusions hold.

1. If  $s \in (0, 1/(2 + \max\{1, \beta\}))$ , takes  $t_n = \Theta(n^{(1-2s)\hat{\gamma}_n})$ , with probability at least  $1 - \delta$ , we have

$$|\hat{\theta}_{n,t}^{\text{IPW}} - \theta^{\text{NETE}}| = O(e(t_n) + n^{-s} \log(1/\delta) + n^{-c_\alpha} \log(n) \log(1/\delta)).$$

2. If  $s \in [1/(2 + \max\{1, \beta\}), 1/2]$ , takes  $t = \Theta(n^{(\hat{\gamma}_n/(1+2\min\{1, \hat{\gamma}_n\}))})$ , with probability at least  $1 - \delta$ , we have

$$|\hat{\theta}_{n,t}^{\text{IPW}} - \theta^{\text{NETE}}| = O(e(t_n) + n^{-1/(2+\max\{\beta, 1\})} \log(1/\delta) + n^{-c_\alpha} \log(n) \log(1/\delta)).$$

*Proof of Corollary 3.6.* By Theorem 3.5 and the error rate assumption in Corollary 3.6, we have

$$\begin{aligned} |\hat{\theta}_{n,t}^{\text{DR}} - \theta^{\text{NETE}}| &\leq O(\log(1/\delta) t^{\beta/4} n^{-1/2} + t^{\beta/2} n^{-1/2} + \log(1/\delta) n^{-1/(2+\beta)} \\ &\quad + t^{-\min\{1, \beta\}} + t^{-\beta s/(1-2s)} + \log(t) \log(1/\delta) n^{-c_\alpha} + e(t)) \\ &\leq O(\log(1/\delta) t^{\beta/2} n^{-1/2} + \log(1/\delta) n^{-1/(2+\beta)} \\ &\quad + t^{-\min\{1, \beta\}} + t^{-\beta s/(1-2s)} + \log(t) \log(1/\delta) n^{-c_\alpha} + e(t)). \end{aligned}$$

If  $s \in (0, 1/(2 + \max\{1, \beta\}))$ , we have

$$\begin{aligned} |\hat{\theta}_{n,t}^{\text{DR}} - \theta^{\text{NETE}}| &\leq O(\log(1/\delta) t^{\beta/2} n^{-1/2} + \log(1/\delta) n^{-1/(2+\beta)} \\ &\quad + t^{-\beta s/(1-2s)} + \log(t) \log(1/\delta) n^{-c_\alpha} + e(t)). \end{aligned}$$

Takes  $t_n = \Theta(n^{(1-2s)\hat{\gamma}_n})$ , we get

$$\begin{aligned} |\hat{\theta}_{n,t_n}^{\text{DR}} - \theta^{\text{NETE}}| &\leq O(\log(1/\delta) n^{(1-2s)\hat{\gamma}_n \beta/2 - 1/2} + \log(1/\delta) n^{-1/(2+\beta)} \\ &\quad + n^{-\hat{\gamma}_n \beta s} + \log(t) \log(1/\delta) n^{-c_\alpha} + e(t_n)). \end{aligned} \quad (\text{B.8})$$

By Lemma B.1, we have

$$|\hat{\gamma}_n - \gamma| = |\hat{\gamma}_n - 1/\beta| \leq O(\log(1/\delta) n^{-1/(2+\beta)}).$$

Therefore,  $n^{\hat{\gamma}_n \beta} = 1 + O(n^{-1/(2+\beta)})$ . Plug this bound into (B.8) and we can get the results. Similarly, if  $s \in [1/(2 + \max\{1, \beta\}), 1/2]$ , we have

$$\begin{aligned} |\hat{\theta}_{n,t}^{\text{DR}} - \theta^{\text{NETE}}| &\leq O(\log(1/\delta) t^{\beta/2} n^{-1/2} + \log(1/\delta) n^{-1/(2+\beta)} \\ &\quad + t^{-\min\{1, \beta\}} + \log(t) \log(1/\delta) n^{-c_\alpha} + e(t)). \end{aligned}$$

Take  $t_n = \Theta(\hat{\gamma}_n/(1 + 2\min\{1, \hat{\gamma}_n\}))$ , we get the results.  $\square$

## C Experiment Details

In this section, we introduce some details in our experiments. The two baseline estimators we consider are naive-IPW:

$$\hat{\theta}_{n,t}^{\text{Naive-IPW}} = \frac{1}{t^{\alpha} n_t} \sum_{i > n/2: \|U_i\| \geq t} Y_i \left( \frac{D_i}{\hat{p}(X_i)} - \frac{1 - D_i}{1 - \hat{p}(X_i)} \right).$$

and naive-DR:

$$\hat{\eta}_{n,t}^{\text{Naive-DR}} = \frac{1}{t^{\alpha} n_t} \sum_{i > n/2: \|U_i\| \geq t} \left[ \hat{g}(X_i, 1, U_i) - \hat{g}(X_i, 0, U_i) + \frac{D_i - \hat{p}(X_i)}{\hat{p}(X_i)(1 - \hat{p}(X_i))} (Y_i - \hat{g}(X_i, D_i, U_i)) \right],$$

where  $n_t = \sum_{i=\lfloor n/2 \rfloor + 1}^n I(\|U_i\| \geq t)$  and  $\hat{p}(X)$  and  $\hat{g}(\cdot)$  are the estimated propensity function and the outcome function respectively. The nuisance estimation of  $\hat{g}$  is obtained by running a regression  $Y \sim (X, D, U)$ . We clip the propensity to  $[10^{-4}, 1 - 10^{-4}]$  to ensure the overlap assumption (Assumption 2.2).  $\epsilon \sim \text{Unif}([-1, 1])$  in the data generation in synthetic experiments. We use sample splitting in our experiment, using the first half for nuisance estimation. In the experiment, we use the same threshold  $t$  for all estimators, which is given by Corollary 3.6. To choose the threshold, we first use the adaptive Hill estimator Boucheron and Thomas [2015] to get an estimation of EVI  $\hat{\gamma}_n$  and then set the threshold to be  $t = 0.25n^{(\hat{\gamma}_n/(1+2\min\{1, \hat{\gamma}_n\}))}$  as in Theorem 3.5. The approximate exponential  $\hat{\alpha}_n$  is coefficient of  $\log(\|U\|)$  in linear regression  $\log(|Y|) \sim \log(\|U\|)$ . For the adaptive Hill estimator Boucheron and Thomas [2015], we follow authors' choice for hyperparameters and choose  $l_n = 30, r(\delta) = \sqrt{\log \log(n)}$  and

$$k = \min \left\{ k \in \{l_n, \dots, n\} \text{ and } \exists i \in \{l_n, \dots, n\}, |\hat{\gamma}(i) - \hat{\gamma}(k)| > \frac{\hat{\gamma}(i)r_n(\delta)}{\sqrt{i}} \right\} - 1,$$

where  $\hat{\gamma}(i) = \frac{1}{i} \sum_{j=1}^i \log \frac{\|U_{(j)}\|}{\|U_{(i+1)}\|}$ .

We run logistic regression to estimate the propensity function and use random forest to model the outcome.

For the semi-synthetic experiment, we apply the same hyperparameter as above to estimate NETE. We shift the data to make it positive and normalize each dimension by its 10 % quantile. The Fig. 3 shows the rough distribution of the wavesurge data after these transformations.

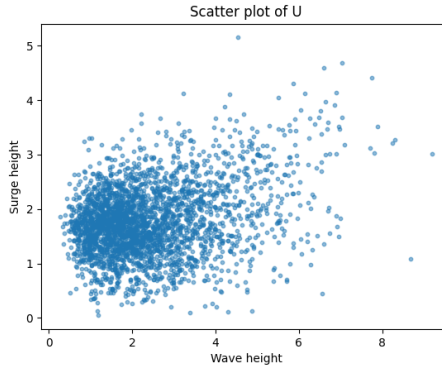

Figure 3: The scatter plot of wavesurge data.

We now describe how we calculate test-set estimation in our experiments. By the data generation process,

$$\begin{aligned} \theta^{\text{NETE}} &= \lim_{t \rightarrow \infty} \mathbb{E} \left[ \frac{W^{\alpha_1} S^{\alpha_2}}{t^{\alpha_1 + \alpha_2}} \mid \|U\| > t \right] \\ &= \lim_{t \rightarrow \infty} \mathbb{E} \left[ \frac{W^{\alpha_1} S^{\alpha_2}}{\|U\|^{\alpha_1 + \alpha_2}} \mid \|U\| > t \right] \cdot \frac{1}{1 - (\alpha_1 + \alpha_2)\gamma}, \end{aligned}$$

818 where we use Proposition 3.3 in the second equality. We know the ground-truth  $\alpha_1, \alpha_2$  and we  
 819 can estimate the EVI  $\gamma$  using the test set. Suppose the estimated EVI is  $\hat{\gamma}$ , we set the threshold to  
 820  $t_n = 0.25n^{(\hat{\gamma}/(1+2\min\{1, \hat{\gamma}\}))}$  and get estimation

$$\hat{\theta}_{\text{test}}^{\text{NETE}} = \mathbb{E}_n \left[ \frac{W^{\alpha_1} S^{\alpha_2}}{\|U\|_{\alpha_1 + \alpha_2}} \mid \|U\| > t_n \right] \cdot \frac{1}{1 - (\alpha_1 + \alpha_2)\hat{\gamma}}.$$
